# Supplementary material
Source: Research Square preprint supplement (doi:10.21203/rs.3.rs-9575763/v1)
Supplement: Supplementary file 1 [file d30722e4d49db03e9fbf56b6.docx]

**Supplementary Material**

**Annex 1**

80 studies which were selected for the exercise. These studies used either empirical research, modelling analyses or literature reviews as a way to understand the impacts of A/R. Preliminary qualitative coding was done after screening full texts to isolate cases of observed A/R impacts.

| No. | Study Reference | Case Location | Methodology | Associated Cases |
| --- | --- | --- | --- | --- |
| 1 | Antisari et al., 2018 | - North Apennines, Italy | Empirical Analysis | 1) Effects of A/R on soil properties |
| 2 | Birge & Berger, 2019 | - Abu Dhabi, United Arab Emirates | Modelled Analysis | 2) GHG removal/ emission reduction through A/R |
| 3 | Cao et al., 2017 | - Chanting County, China | Empirical Analysis | 3) Assessment of A/R techniques |
| 4 | Capítulo et al., 2018 | - Partido de Pinamar, Argentina | Empirical Analysis | 4) Effect on water cycle and quality |
| 5 | Certini et al., 2023 | - Santa Barbara, Tuscany, Italy | Empirical Analysis | 5) Effects of A/R on soil properties |
| 6 | Chirilus et al., 2022 | - Petrestii de Jos, Romania | Empirical Analysis | 6) Effects of A/R on soil properties |
| 7 | Cukor et al., 2022 | - Broumovsko Protected Landscape Area, Czechia | Empirical Analysis | 7) Effect on biodiversity and other ecological consequences |
| 8 | Dang et al., 2017 | - Longde County, Ningxia Hui Autonomous Region, China | Empirical Analysis | 8) Effects of A/R on soil properties |
| 9 | del Campo et al., 2021 | - Cortes de Pallas, Valencia, Spain | Empirical Analysis | 9) Effect on growth and longevity |
| 10 | Delcourt et al., 2023 | - Parc Naturel Régional du Luberon, France | Empirical Analysis | 10) Effect on biodiversity and other ecological consequences |
| 11 | (Dennis et al., 2020) | - Cooke 4 mine, Guateng Province, South Africa | Modelled Analysis | 11) Effect on water cycle and quality |
| 12 | (Devaney et al., 2021) | - Bettenty , Senegal | Empirical Analysis | 12) Effect on growth and longevity |
| 13 | (Ding & Yao, 2022) | - Northern Shaanxi Loess Plateau, China | Modelled Analysis | 13) Assessment of A/R techniques |
| 14 | (Dong et al., 2022) | - Heshui County, Chinese Loess Plateau, China | Empirical Analysis | 14) Effect on biodiversity and other ecological consequences |
| 15 | (Duangdai & Likasiri, 2017) | - Northern Thailand, Thailand | Modelled Analysis | 15) Effect on regional climate |
| 16 | (Dubois et al., 2023) | - Quebec, Canada | Modelled Analysis | 16) Effect on water cycle and quality |
| 17 | (Fakhech et al., 2019) | - Essaouira region, Morocco | Empirical Analysis | 17) Assessment of A/R techniques |
| 18 | (Fang et al., 2016) | - Du river catchment area, Hubei Province, China | Empirical Analysis | 18) Effect on water cycle and quality |
| 19 | (Gençay, 2020) | - Keshan Forest District, Turkey | Empirical Analysis | 19) Assessment of institutional mechanisms |
| 20 | (Giacona et al., 2018) | - Vosges Mountains, France | Empirical Analysis | 20) Effect on regional climate |
| 21 | (Guo et al., 2018) | - Jinjiang Estuary, Fujian, China | Empirical Analysis | 21) Effects of A/R on soil properties |
| 22 | (Gyenge et al., 2024) | - Argentina | Empirical Analysis | 22) Effects of A/R on soil properties |
| 23 | (Han et al., 2021) | - Loess Plateau, China | Modelled Analysis | 23) Cost-effectiveness and optimisation |
| 24 | (Han & Chen, 2022) | - Pearl River Delta region, Guangdong Province, China | Modelled Analysis | 24) Cost-effectiveness and optimisation |
| 25 | (Han et al., 2022) | - Yanhe River Basin, Shaanxi Province, China | Modelled Analysis | 25) Effect on water cycle and quality |
| 26 | (Houet et al., 2017) | - French Pyrenees, Cauterets, France | Modelled Analysis | 26) Effect on regional climate |
| 27 | (Hu & Xu, 2018) | - Fujian City, China | Modelled Analysis | 27) Assessment of A/R techniques |
| 28 | (Huang et al., 2020) | - Mu Us Sandy Land, Wushen County, China | Empirical Analysis | 28) Effect on water cycle and quality |
| 29 | (Johansen et al., 2017) | - Nord-Trøndelag and Nordland, Norway | Modelled Analysis | 29) Cost-effectiveness and optimisation |
| 30 | (Jost et al., 2021) | - Mostviertel, Lower Austria, Austria | Modelled Analysis | 30) Effects of A/R on soil properties |
| 31 | (Kang et al., 2018) | - Dongping National Park, Shanghai, China | Empirical Analysis | 31) Effects of A/R on soil properties |
| 32 | (Královec et al., 2016) | - Zbytiny village, Czechia | Empirical Analysis | 32) Effect on water cycle and quality |
| 33 | (Lai et al., 2020) | - Sardania, Italy | Modelled Analysis | 33) Effect on regional climate |
| 34 | (Lebek et al., 2019) | - Umvoti River Basin, Kwazulu-Natal, South Africa | Modelled Analysis | 34) Effect on water cycle and quality |
| 35 | (Li et al., 2021) | - Huining County, Gansu Province, Italy | Modelled Analysis | 35) Effects of A/R on soil properties |
| 36 | (Liu et al., 2019) | - Wuhan, China | Modelled Analysis | 36) Effect on regional climate |
| 37 | (Liu & Yao, 2021) | - Shaanxi Province, China | Modelled Analysis | 37) Cost-effectiveness and optimisation |
| 38 | (Liu et al., 2022) | - Wuhai City, Nei Monggol Autonomous Region, China | Empirical Analysis | 38) Effects of A/R on soil properties |
| 39 | (Lu et al., 2020) | - Zhangjiakou City, Hebei Province, China | Empirical Analysis | 39) Effect on growth and longevity |
| 40 | (Lukic et al., 2016) | - Grdelica Gorge, Serbia | Empirical Analysis | 40) Effect on biodiversity and other ecological consequences |
| 41 | (Ma et al., 2016) | - Shaoyang, Hunan Province, China | Empirical Analysis | 41) Effects of A/R on soil properties |
| 42 | (McConnell et al., 2019) | - Louisiana, United States of America | Empirical Analysis | 42) Assessment of institutional mechanisms |
| 43 | (Missall et al., 2015) | - Aksu Prefecture, Xinjiang Uyghur Autonomous Region, China | Literature Review | 43) Assessment of institutional mechanisms |
| 44 | (Navas et al., 2019) | - Santa Lucía catchment area at Paso Pache, Uruguay | Modelled Analysis | 44) Effect on water cycle and quality |
| 45 | (Özcan & Çiçek, 2023) | - Black Sea Region, Turkey, Lebanon, Syria | Modelled Analysis | 45) Assessment of A/R techniques |
| 46 | (Paul et al., 2015) | - Chepo, Panama | Empirical Analysis | 46) Cost-effectiveness and optimisation |
| 47 | (Perdomo-González et al., 2023) | - Lanzarote, Canary Island Archipelago, Spain | Empirical Analysis | 47) Effect on biodiversity and other ecological consequences |
| 48 | (Pham et al., 2015) | - Vietnam | Literature Review | 48) Effect on socio-economic conditions |
| 49 | (Qiu et al., 2022) | - Guizhou Province, China | Modelled Analysis | 49) Effect on socio-economic conditions |
| 50 | (Rasiah et al., 2015) | - Corangaminte Catchment, Victoria, Australia | Empirical Analysis | 50) Effects of A/R on soil properties |
| 51 | (Roibás et al., 2018) | - Galacia, Spain - La Union, El Salvador | Empirical Analysis | 51) assessment of A/R techniques  52) assessment of A/R techniques |
| 52 | (Sidau et al., 2021) | - Ruscova river upper basin, Romania | Modelled Analysis | 53) Effect on water cycle and quality |
| 53 | (Somprasong et al., 2024) | - Mae Moh mine, Lampang, Thailand | Modelled Analysis | 54) Assessment of A/R techniques |
| 54 | (Sonu et al., 2022) | - Kuttanad and Meenachil River Basin, Kerala, India | Modelled Analysis | 55) Effect on regional climate |
| 55 | (Summers et al., 2015) | - Australia | Modelled Analysis | 56) Cost-effectiveness and optimisation |
| 56 | (WH Sun et al., 2021) | - Qingjian County, Shaanxi Province, China | Empirical Analysis | 57) Effects of A/R on soil properties |
| 57 | (WL Sun et al., 2021) | - Changqing National Nature Reserve, Quinlin Mountains, China | Empirical Analysis | 58) Effect on biodiversity and other ecological consequences |
| 58 | (Survila et al., 2022) | - Druskininkai district, Lithuania | Empirical Analysis | 59) Assessment of A/R techniques |
| 59 | (Takele et al., 2022) | - Awash Basin, Ethiopia | Empirical Analysis | 60) Effect on growth and longevity |
| 60 | (Tan et al., 2021) | - Muda River Basin, Malaysia | Modelled Analysis | 61) Effect on water cycle and quality |
| 61 | (Tuswa et al., 2019) | - George, Western Cape Province, South Africa | Modelled Analysis | 62) Effect on water cycle and quality |
| 62 | (Van der Sluis et al., 2019) | - Lesvos, Greece - Roskilde, Denmark - Heerde, Netherlands - Portofino, Italy - Stancuta, Romania - Ratesi, Romania | Literature Review | 63) Effect on socio-economic conditions  64) Effect on socio-economic conditions  65) Effect on socio-economic conditions  66) Effect on socio-economic conditions  67) Effect on socio-economic conditions  68) Effect on socio-economic conditions |
| 63 | (Vilén et al., 2016) | - Finland - Czechia | Modelled Analysis | 69) Assessment of A/R techniques  70) Assessment of A/R techniques |
| 64 | (Vinogradovs et al., 2018) | - Vidzeme, Latvia | Empirical Analysis | 71) Effect on socio-economic conditions |
| 65 | (Wang et al., 2019) | - Kubuqi desert, Inner Mongolia, China | Modelled Analysis | 72) Effect on regional climate |
| 66 | (Waseem & Khayyam, 2019) | - Islamabad, Pakistan | Modelled Analysis | 73) Effect on regional climate |
| 67 | (Webber et al., 2021) | - Southwest England, United Kingdom | Empirical Analysis | 74) Effect on water cycle and quality |
| 68 | (Work, 2017) | - Prey Lang Forest, Cambodia | Empirical Analysis | 75) Effect on socio-economic conditions |
| 69 | (Yani, 2020) | - Melawi Regency of West Kalimantan Province, Indonesia | Modelled Analysis | 76) Cost-effectiveness and optimisation |
| 70 | (Yazici & Turan, 2016) | - Kutahya, Turkey | Empirical Analysis | 77) Effects of A/R on soil properties |
| 71 | (Yemshanov et al., 2018) | - Canada | Modelled Analysis | 78) Cost-effectiveness and optimisation |
| 72 | (Yi et al., 2022) | - Hubei Province, China | Empirical Analysis | 79) Assessment of A/R techniques |
| 73 | (Yucekaya & Uslu, 2020) | - Gaziantep, Turkey | Modelled Analysis | 80) Effect on regional climate |
| 74 | (Zanon et al., 2021) | - Registro, Sao Paulo, Brazil | Empirical Analysis | 81) Effect on growth and longevity |
| 75 | (Zhang et al., 2021) | - Yangtze River Basin, China | Modelled Analysis | 82) Effect on water cycle and quality |
| 76 | (Zheng et al., 2020) | - Mu Us Sandy Land, Wushen County, China | Modelled Analysis | 83) Effect on regional climate |
| 77 | (Zhou et al., 2022) | - Gualing County, Guizhou Province, China | Empirical Analysis | 84) Effects of A/R on soil properties |
| 78 | (Zhou et al., 2019) | - Changzhou city, Jiangsu Province, China | Modelled Analysis | 85) GHG removal/ emission reduction through A/R |
| 79 | (Zhu et al., 2021) | - Loess Plateau, China | Empirical Analysis | 86) Effect on biodiversity and other ecological consequences |
| 80 | (Zhuang et al., 2017) | - Yellow River basin, China | Modelled Analysis | 87) Effect on regional climate |

Reference List

Antisari, L., Papp, R., Vianello, G., & Marinari, S. (2018). Effects of Douglas Fir Stand Age on Soil Chemical Properties, Nutrient Dynamics, and Enzyme Activity: A Case Study in Northern Apennines, Italy. *FORESTS*, *9*(10). (WOS:000448550700060). https://doi.org/10.3390/f9100641

Birge, D., & Berger, A. (2019). Transitioning to low-carbon suburbs in hot-arid regions: A case-study of Emirati villas in Abu Dhabi. *BUILDING AND ENVIRONMENT*, *147*, 77–96. (WOS:000453338500007). https://doi.org/10.1016/j.buildenv.2018.09.013

Cao, S., Lu, C., & Yue, H. (2017). Optimal Tree Canopy Cover during Ecological Restoration: A Case Study of Possible Ecological Thresholds in Changting, China. *BIOSCIENCE*, *67*(3), 221–232. (WOS:000397164000006). https://doi.org/10.1093/biosci/biw157

Capítulo, L., Carretero, S., & Kruse, E. (2018). Impact of afforestation on coastal aquifer recharge. Case study: Eastern coast of the Province of Buenos Aires, Argentina. *ENVIRONMENTAL EARTH SCIENCES*, *77*(3). (WOS:000424871000034). https://doi.org/10.1007/s12665-018-7258-0

Certini, G., Manetti, M., Mariotti, B., Maltoni, A., Moretti, G., & Pelleri, F. (2023). Does association with N-fixing nurse trees improve carbon sequestration in walnut plantations? Case-study on a reclaimed opencast mine in Italy. *FOREST ECOLOGY AND MANAGEMENT*, *545*. (WOS:001042142800001). https://doi.org/10.1016/j.foreco.2023.121245

Chirilus, G., Lakatos, E., Bslc, R., Badarau, A., Cioca, L., David, G., & Rosian, G. (2022). Assessment of Organic Carbon Sequestration from Romanian Degraded Soils: Livada Forest Plantation Case Study. *ATMOSPHERE*, *13*(9). (WOS:000858039400001). https://doi.org/10.3390/atmos13091452

Cukor, J., Vacek, Z., Vacek, S., Linda, R., & Podrázsky, V. (2022). Biomass productivity, forest stability, carbon balance, and soil transformation of agricultural land afforestation: A case study of suitability of native tree species in the submontane zone in Czechia. *CATENA*, *210*. (WOS:000794856500003). https://doi.org/10.1016/j.catena.2021.105893

Dang, X., Liu, G., Zhao, L., & Zhao, G. (2017). The response of carbon storage to the age of three forest plantations in the Loess Hilly Regions of China. *CATENA*, *159*, 106–114. (WOS:000412254700010). https://doi.org/10.1016/j.catena.2017.08.013

del Campo, A., Segura-Orenga, G., Bautista, I., Ceacero, C., González-Sanchis, M., Molina, A., & Hermoso, J. (2021). Assessing reforestation failure at the project scale: The margin for technical improvement under harsh conditions. A case study in a Mediterranean Dryland. *SCIENCE OF THE TOTAL ENVIRONMENT*, *796*. (WOS:000698509800009). https://doi.org/10.1016/j.scitotenv.2021.148952

Delcourt, N., Dupuy, N., Rébufa, C., Aupic-Samain, A., Foli, L., & Silva, A. (2023). Rapid Assessment of Land Use Legacy Effect on Forest Soils: A Case Study on Microarthropods Used as Indicators in Mediterranean Post-Agricultural Forests. *FORESTS*, *14*(11). (WOS:001107889800001). https://doi.org/10.3390/f14112223

Dennis, R., Dennis, I., Mokadem, N., & Smit, S. (2020). Investigate the possible reduction of mine water ingress by introducing tree plantations: Case study of Cooke 4 mine (South Africa). *JOURNAL OF AFRICAN EARTH SCIENCES*, *161*. (WOS:000501409200015). https://doi.org/10.1016/j.jafrearsci.2019.103660

Devaney, J., Marone, D., & McElwain, J. (2021). Impact of soil salinity on mangrove restoration in a semiarid region: A case study from the Saloum Delta, Senegal. *RESTORATION ECOLOGY*, *29*(2). (WOS:000567297800001). https://doi.org/10.1111/rec.13186

Ding, Z., & Yao, S. (2022). Assessing the ecological effectiveness of Sloping Land Conversion Programme to identify vegetation restoration types: A case study of Northern Shaanxi Loess Plateau, China. *ECOLOGICAL INDICATORS*, *145*. (WOS:000934000800004). https://doi.org/10.1016/j.ecolind.2022.109671

Dong, H., Song, Y., Chen, L., Liu, H., Fu, X., & Xie, M. (2022). Soil erosion and human activities over the last 60 years revealed by magnetism, particle size and minerals of check dams sediments on the Chinese Loess Plateau. *ENVIRONMENTAL EARTH SCIENCES*, *81*(5). (WOS:000762323700001). https://doi.org/10.1007/s12665-022-10245-8

Duangdai, E., & Likasiri, C. (2017). Rainfall model investigation and scenario analyses of the effect of government reforestation policy on seasonal rainfalls: A case study from Northern Thailand. *ATMOSPHERIC RESEARCH*, *185*, 1–12. (WOS:000390737800001). https://doi.org/10.1016/j.atmosres.2016.10.019

Dubois, E., Larocque, M., & Brunner, P. (2023). Impact of land cover changes on Long-Term Regional-Scale groundwater recharge simulation in cold and humid climates. *HYDROLOGICAL PROCESSES*, *37*(2). (WOS:000922359800001). https://doi.org/10.1002/hyp.14810

Fakhech, A., Manaut, N., Ouahmane, L., & Hafidi, M. (2019). Contributions of indigenous arbuscular mycorrhizal fungi to growth of retama monosperma and acacia gummifera under water stress (case study: Essaouira sand dunes forest). *JOURNAL OF SUSTAINABLE FORESTRY*, *38*(7), 686–696. (WOS:000478054400005). https://doi.org/10.1080/10549811.2019.1602057

Fang, N., Chen, F., Zhang, H., Wang, Y., & Shi, Z. (2016). Effects of cultivation and reforestation on suspended sediment concentrations: A case study in a mountainous catchment in China. *HYDROLOGY AND EARTH SYSTEM SCIENCES*, *20*(1), 13–25. (WOS:000369668400002). https://doi.org/10.5194/hess-20-13-2016

Gençay, G. (2020). Legal framework of private afforestation: The case of Turkey. *LAND USE POLICY*, *96*. (WOS:000541149900043). https://doi.org/10.1016/j.landusepol.2020.104673

Giacona, F., Eckert, N., Mainieri, R., Martin, B., Corona, C., Lopez-saez, J., Monnet, J., Naaim, M., & Stoffel, M. (2018). Avalanche activity and socio-environmental changes leave strong footprints in forested landscapes: A case study in the Vosges medium-high mountain range. *ANNALS OF GLACIOLOGY*, *59*(77), 111–133. (WOS:000469785400013). https://doi.org/10.1017/aog.2018.26

Guo, P., Sun, Y., Su, H., Wang, M., & Zhang, Y. (2018). Spatial and temporal trends in total organic carbon (TOC), black carbon (BC), and toted nitrogen (TN) and their relationships under different planting patterns in a restored coastal mangrove wetland: Case study in Fujian, China. *CHEMICAL SPECIATION AND BIOAVAILABILITY*, *30*(1), 47–56. (WOS:000451988600001). https://doi.org/10.1080/09542299.2018.1484673

Gyenge, J., Gatica, G., Sandoval, M., Lupi, A., Gaute, M., Fernández, M., & Peri, P. (2024). Change of soil carbon storage in monoculture tree plantations across wide environmental gradients: Argentina as a case study. *FOREST ECOLOGY AND MANAGEMENT*, *552*. (WOS:001128251600001). https://doi.org/10.1016/j.foreco.2023.121565

Han, Q., Ding, Y., & Peng, S. (2021). Sustainable and cost-effective vegetation restoration framework under climate change. *FOREST ECOLOGY AND MANAGEMENT*, *496*. (WOS:000672641800003). https://doi.org/10.1016/j.foreco.2021.119436

Han, W., & Chen, W. (2022). Embedding nature-based solutions into the social cost of carbon. *ENVIRONMENT INTERNATIONAL*, *167*. (WOS:000855689400007). https://doi.org/10.1016/j.envint.2022.107431

Han, Y., Xia, F., Huang, H., Mu, W., & Jia, D. (2022). Impact of the Grain for Green Project on water resources and ecological water stress in the Yanhe River Basin. *PLOS ONE*, *17*(6). (WOS:000843613300002). https://doi.org/10.1371/journal.pone.0259611

Houet, T., Grémont, M., Vacquié, L., Forget, Y., Marriotti, A., Puissant, A., Bernardie, S., Thiery, Y., Vandromme, R., & Grandjean, G. (2017). Downscaling scenarios of future land use and land cover changes using a participatory approach: An application to mountain risk assessment in the Pyrenees (France). *REGIONAL ENVIRONMENTAL CHANGE*, *17*(8), 2293–2307. (WOS:000415136200009). https://doi.org/10.1007/s10113-017-1171-z

Hu, X., & Xu, H. (2018). A new remote sensing index for assessing the spatial heterogeneity in urban ecological quality: A case from Fuzhou City, China. *ECOLOGICAL INDICATORS*, *89*, 11–21. (WOS:000430760900002). https://doi.org/10.1016/j.ecolind.2018.02.006

Huang, T., Pang, Z., Yang, S., & Yin, L. (2020). Impact of Afforestation on Atmospheric Recharge to Groundwater in a Semiarid Area. *JOURNAL OF GEOPHYSICAL RESEARCH-ATMOSPHERES*, *125*(9). (WOS:000536605500027). https://doi.org/10.1029/2019JD032185

Johansen, U., Werner, A., & Norstebo, V. (2017). Optimizing the Wood Value Chain in Northern Norway Taking Into Account National and Regional Economic Trade-Offs. *FORESTS*, *8*(5). (WOS:000404099300034). https://doi.org/10.3390/f8050172

Jost, E., Schönhart, M., Skalsky, R., Balkovic, J., Schmid, E., & Mitter, H. (2021). Dynamic soil functions assessment employing land use and climate scenarios at regional scale. *JOURNAL OF ENVIRONMENTAL MANAGEMENT*, *287*. (WOS:000639202900012). https://doi.org/10.1016/j.jenvman.2021.112318

Kang, H., Gao, H., Yu, W., Yi, Y., Wang, Y., & Ning, M. (2018). Changes in soil microbial community structure and function after afforestation depend on species and age: Case study in a subtropical alluvial island. *SCIENCE OF THE TOTAL ENVIRONMENT*, *625*, 1423–1432. (WOS:000426356600143). https://doi.org/10.1016/j.scitotenv.2017.12.180

Královec, V., Kliment, Z., & Matousková, M. (2016). Evaluation of runoff response on the basis of a comparative paired research in mountain catchments with the different land use: Case study of the Blanice River, Czechia. *GEOGRAFIE*, *121*(2), 209–234. (WOS:000386500300001).

Lai, S., Leone, F., & Zoppi, C. (2020). Spatial Distribution of Surface Temperature and Land Cover: A Study Concerning Sardinia, Italy. *SUSTAINABILITY*, *12*(8). (WOS:000535598700119). https://doi.org/10.3390/su12083186

Lebek, K., Senf, C., Frantz, D., Monteiro, J., & Krueger, T. (2019). Interdependent effects of climate variability and forest cover change on streamflow dynamics: A case study in the Upper Umvoti River Basin, South Africa. *REGIONAL ENVIRONMENTAL CHANGE*, *19*(7), 1963–1971. (WOS:000488930500011). https://doi.org/10.1007/s10113-019-01521-8

Li, K., Cao, J., Adamowski, J., Biswas, A., Zhou, J., Liu, Y., Zhang, Y., Liu, C., Dong, X., & Qin, Y. (2021). Assessing the effects of ecological engineering on spatiotemporal dynamics of carbon storage from 2000 to 2016 in the Loess Plateau area using the InVEST model: A case study in Huining County, China. *ENVIRONMENTAL DEVELOPMENT*, *39*. (WOS:000687314000002). https://doi.org/10.1016/j.envdev.2021.100641

Liu, H., Zhan, Q., Yang, C., & Wang, J. (2019). The multi-timescale temporal patterns and dynamics of land surface temperature using Ensemble Empirical Mode Decomposition. *SCIENCE OF THE TOTAL ENVIRONMENT*, *652*, 243–255. (WOS:000454418500022). https://doi.org/10.1016/j.scitotenv.2018.10.252

Liu, S., & Yao, S. (2021). The effect of precipitation on the Cost-Effectiveness of Sloping land conversion Program: A case study of Shaanxi Province, China. *ECOLOGICAL INDICATORS*, *132*. (WOS:000710492300001). https://doi.org/10.1016/j.ecolind.2021.108251

Liu, X., Zhang, L., Wu, P., & Deng, H. (2022). A new small-scale system of rainwater harvesting combined with irrigation for afforestation in mine area: Optimizing design and application. *JOURNAL OF ENVIRONMENTAL MANAGEMENT*, *322*. (WOS:000858341100001). https://doi.org/10.1016/j.jenvman.2022.116129

Lu, L., Xu, Y., Huang, A., Liu, C., Marcos-Martinez, R., & Huang, L. (2020). Influences of Topographic Factors on Outcomes of Forest Programs and Policies in a Mountain Region of China: A Case Study. *MOUNTAIN RESEARCH AND DEVELOPMENT*, *40*(1), R48–R60. (WOS:000620434900011). https://doi.org/10.1659/MRD-JOURNAL-D-18-00050.1

Lukic, S., Pantic, D., Simic, S., Borota, D., Tubic, B., Djukic, M., & Djunisijevic-Bojovic, D. (2016). Effects of black locust and black pine on extremely degraded sites 60 years after afforestation—A case study of the Grdelica Gorge (southeastern Serbia). *IFOREST-BIOGEOSCIENCES AND FORESTRY*, *9*, 235–243. (WOS:000378113200001). https://doi.org/10.3832/ifor1512-008

Ma, W., Li, Z., Ding, K., Huang, B., Nie, X., Lu, Y., & Xiao, H. (2016). Soil erosion, organic carbon and nitrogen dynamics in planted forests: A case study in a hilly catchment of Hunan Province, China. *SOIL & TILLAGE RESEARCH*, *155*, 69–77. (WOS:000366066200009). https://doi.org/10.1016/j.still.2015.07.007

McConnell, T., VanderSchaaf, C., Holderieath, J., & Crosby, M. (2019). Adequacy of Timber Trespass Civil Awards: A Louisiana Case Study. *JOURNAL OF FORESTRY*, *117*(6), 533–542. (WOS:000506050500001). https://doi.org/10.1093/jofore/fvz052

Missall, S., Welp, M., Thevs, N., Abliz, A., & Halik, Ü. (2015). Establishment and maintenance of regulating ecosystem services in a dryland area of central Asia, illustrated using the Kokyar Protection Forest, Aksu, NW China, as an example. *EARTH SYSTEM DYNAMICS*, *6*(1), 359–373. (WOS:000360804800010). https://doi.org/10.5194/esd-6-359-2015

Navas, R., Alonso, J., Gorgoglione, A., & Vervoort, R. (2019). Identifying Climate and Human Impact Trends in Streamflow: A Case Study in Uruguay. *WATER*, *11*(7). (WOS:000480632300118). https://doi.org/10.3390/w11071433

Özcan, A., & Çiçek, K. (2023). How long do we think humans have been planting forests? A case study with Cedrus libani A. Rich. *NEW FORESTS*, *54*(1), 49–65. (WOS:000750305600001). https://doi.org/10.1007/s11056-021-09900-y

Paul, C., Griess, V., Havardi-Burger, N., & Weber, M. (2015). Timber-based agrisilviculture improves financial viability of hardwood plantations: A case study from Panama. *AGROFORESTRY SYSTEMS*, *89*(2), 217–235. (WOS:000351195300003). https://doi.org/10.1007/s10457-014-9755-9

Perdomo-González, A., Pérez-Reverón, R., Goberna, M., León-Barrios, M., Fernández-López, M., Villadas, P., Reyes-Betancort, A., & Díaz-Peña, F. (2023). How harmful are exotic plantations for soils and its microbiome? A case study in an arid island. *SCIENCE OF THE TOTAL ENVIRONMENT*, *879*. (WOS:000968923600001). https://doi.org/10.1016/j.scitotenv.2023.163030

Pham, T., Turner, S., & Trincsi, K. (2015). Applying a Systematic Review to Land Use Land Cover Change in Northern Upland Vietnam: The Missing Case of the Borderlands. *GEOGRAPHICAL RESEARCH*, *53*(4), 419–435. (WOS:000363517200008). https://doi.org/10.1111/1745-5871.12133

Qiu, S., Peng, J., Quine, T., Green, S., Liu, H., Liu, Y., Hartley, I., & Meersmans, J. (2022). Unraveling Trade-Offs Among Reforestation, Urbanization, and Food Security in the South China Karst Region: How Can a Hinterland Province Achieve SDGs? *EARTHS FUTURE*, *10*(12). (WOS:000924637200001). https://doi.org/10.1029/2022EF002867

Rasiah, V., Florentine, S., & Dahlhaus, P. (2015). Environmental benefits inferred from impact of reforestation of deforested creek bank on soil conditioning: A case study in Victoria, Australia. *AGROFORESTRY SYSTEMS*, *89*(2), 345–355. (WOS:000351195300012). https://doi.org/10.1007/s10457-014-9771-9

Roibás, L., Cuevas, A., Vázquez, M., Vilas, M., & Hospido, A. (2018). Using water scarcity footprint to choose the most suitable location for forest carbon sinks: A case study. *SUSTAINABLE PRODUCTION AND CONSUMPTION*, *16*, 1–12. (WOS:000451188200001). https://doi.org/10.1016/j.spc.2018.06.001

Sidau, M., Horváth, C., Cheveresan, M., Sandric, I., & Stoica, F. (2021). Assessing Hydrological Impact of Forested Area Change: A Remote Sensing Case Study. *ATMOSPHERE*, *12*(7). (WOS:000675976900001). https://doi.org/10.3390/atmos12070817

Somprasong, K., Hutayanon, T., & Jaroonpattanapong, P. (2024). Using Carbon Sequestration as a Remote-Monitoring Approach for Reclamation’s Effectiveness in the Open Pit Coal Mine: A Case Study of Mae Moh, Thailand. *ENERGIES*, *17*(1). (WOS:001139308600001). https://doi.org/10.3390/en17010231

Sonu, S., Mohammed, F., & Bhagyanathan, A. (2022). The impact of upstream land use land cover change on downstream flooding: A case of Kuttanad and Meenachil River Basin, Kerala, India. *URBAN CLIMATE*, *41*. (WOS:000784314600001). https://doi.org/10.1016/j.uclim.2022.101089

Summers, D., Bryan, B., Nolan, M., & Hobbs, T. (2015). The costs of reforestation: A spatial model of the costs of establishing environmental and carbon plantings. *LAND USE POLICY*, *44*, 110–121. (WOS:000351803300011). https://doi.org/10.1016/j.landusepol.2014.12.002

Sun, WL, Liu, X., Tian, Z., & Shao, X. (2021). Analysis on Characteristics of Vegetation and Soil Bacterial Community under 20 Years’ Restoration of Different Tree Species: A Case Study of the Qinling Mountains. *FORESTS*, *12*(5). (WOS:000653921000001). https://doi.org/10.3390/f12050562

Sun, WH, Zhao, X., Gao, X., Shi, W., Ling, Q., & Siddique, K. (2021). Impacts of land use conversion on the response of soil respiration to precipitation in drylands: A case study with four-yearlong observations. *AGRICULTURAL AND FOREST METEOROLOGY*, *304*. (WOS:000652014300011). https://doi.org/10.1016/j.agrformet.2021.108426

Survila, G., Varnagiryte-Kabasinskiene, I., & Armolaitis, K. (2022). Changes in Soil Properties and Scots Pine Tree Growth Induced by Different Soil Ploughing Prior to Afforestation: A Case Study. *FORESTS*, *13*(6). (WOS:000816674400001). https://doi.org/10.3390/f13060900

Takele, A., Lakew, H., & Kabite, G. (2022). Does the recent afforestation program in Ethiopia influenced vegetation cover and hydrology? A case study in the upper awash basin, Ethiopia. *HELIYON*, *8*(6). (WOS:000812036900004). https://doi.org/10.1016/j.heliyon.2022.e09589

Tan, M., Tew, Y., Chun, K., Samat, N., Shaharudin, S., Mahamud, M., & Tangang, F. (2021). Improvement of the ESA CCI Land cover maps for water balance analysis in tropical regions: A case study in the Muda River Basin, Malaysia. *JOURNAL OF HYDROLOGY-REGIONAL STUDIES*, *36*. (WOS:000687247800002). https://doi.org/10.1016/j.ejrh.2021.100837

Tuswa, N., Bugan, R., Mapeto, T., Jovanovic, N., Gush, M., Kapangaziwiri, E., Dzikiti, S., Kanyerere, T., & Xu, Y. (2019). The impacts of commercial plantation forests on groundwater recharge: A case study from George (Western Cape, South Africa). *PHYSICS AND CHEMISTRY OF THE EARTH*, *112*, 187–199. (WOS:000491169000021). https://doi.org/10.1016/j.pce.2018.12.006

Van der Sluis, T., Pedroli, B., Frederiksen, P., Kristensen, S., Busck, A., Pavlis, V., & Cosor, G. (2019). The impact of European landscape transitions on the provision of landscape services: An explorative study using six cases of rural land change. *LANDSCAPE ECOLOGY*, *34*(2), 307–323. (WOS:000462018500007). https://doi.org/10.1007/s10980-018-0765-2

Vilén, T., Cienciala, E., Schelhaas, M., Verkerk, P., Lindner, M., & Peltola, H. (2016). Increasing carbon sinks in European forests: Effects of afforestation and changes in mean growing stock volume. *FORESTRY*, *89*(1), 82–90. (WOS:000370969800008). https://doi.org/10.1093/forestry/cpv034

Vinogradovs, I., Nikodemus, O., Elferts, D., & Brumelis, G. (2018). Assessment of site-specific drivers of farmland abandonment in mosaic-type landscapes: A case study in Vidzeme, Latvia. *AGRICULTURE ECOSYSTEMS & ENVIRONMENT*, *253*, 113–121. (WOS:000418312100011). https://doi.org/10.1016/j.agee.2017.10.016

Wang, L., Lee, X., Feng, D., Fu, C., Wei, Z., Yang, Y., Yin, Y., Luo, Y., & Lin, G. (2019). Impact of Large-Scale Afforestation on Surface Temperature: A Case Study in the Kubuqi Desert, Inner Mongolia Based on the WRF Model. *FORESTS*, *10*(5). (WOS:000478814700008). https://doi.org/10.3390/f10050368

Waseem, S., & Khayyam, U. (2019). Loss of vegetative cover and increased land surface temperature: A case study of Islamabad, Pakistan. *JOURNAL OF CLEANER PRODUCTION*, *234*, 972–983. (WOS:000483406000082). https://doi.org/10.1016/j.jclepro.2019.06.228

Webber, J., Tyler, C., Carless, D., Jackson, B., Tingley, D., Stewart-Sinclair, P., Artioli, Y., Torres, R., Galli, G., Miller, P., Land, P., Zonneveld, S., Austen, M., & Brown, A. (2021). Impacts of land use on water quality and the viability of bivalve shellfish mariculture in the UK: A case study and review for SW England. *ENVIRONMENTAL SCIENCE & POLICY*, *126*, 122–131. (WOS:000708822900010). https://doi.org/10.1016/j.envsci.2021.09.027

Work, C. (2017). Forest Islands and Castaway Communities: REDD plus and Forest Restoration in Prey Lang Forest. *FORESTS*, *8*(2). (WOS:000395659200018). https://doi.org/10.3390/f8020047

Yani, A. (2020). Feasibility Assessment of Converting Forest Into Palm Oil Plantation and Its Implication for Forest Policy and Palm Oil Sustainability Challenges: A Case Study in Melawi Regency of West Kalimantan Province, Indonesia. *FRONTIERS IN SUSTAINABLE FOOD SYSTEMS*, *4*. (WOS:000588476400001). https://doi.org/10.3389/fsufs.2020.521270

Yazici, N., & Turan, A. (2016). EFFECT OF FORESTRY AFFORESTATION ON SOME SOIL PROPERTIES: A CASE STUDY FROM TURKEY. *FRESENIUS ENVIRONMENTAL BULLETIN*, *25*(7), 2509–2513. (WOS:000381779500029).

Yemshanov, D., McKenney, D., Hope, E., & Lempriere, T. (2018). Renewable Energy from Forest ResiduesHow Greenhouse Gas Emission Offsets Can Make Fossil Fuel Substitution More Attractive. *FORESTS*, *9*(2). (WOS:000427520600032). https://doi.org/10.3390/f9020079

Yi, Y., Shi, M., Liu, J., Zhang, C., Yi, X., Li, S., Chen, C., & Lin, L. (2022). Spatial Distribution of Precise Suitability of Plantation: A Case Study of Main Coniferous Forests in Hubei Province, China. *LAND*, *11*(5). (WOS:000803513000001). https://doi.org/10.3390/land11050690

Yucekaya, M., & Uslu, C. (2020). An analytical model proposal to design urban open spaces in balance with climate: A case study of Gaziantep. *LAND USE POLICY*, *95*. (WOS:000537823200022). https://doi.org/10.1016/j.landusepol.2020.104564

Zanon, J., Silva, F., da Silva, R., de Paula, R., & Mariano, L. (2021). Impact of sand mining: A case study of initial growth of forest species for recovery of degraded areas. *BOSQUE*, *42*(1), 111–120. (WOS:000642042700010). https://doi.org/10.4067/S0717-92002021000100111

Zhang, X., Zhang, G., Long, X., Zhang, Q., Liu, D., Wu, H., & Li, S. (2021). Identifying the drivers of water yield ecosystem service: A case study in the Yangtze River Basin, China. *ECOLOGICAL INDICATORS*, *132*. (WOS:000710621100006). https://doi.org/10.1016/j.ecolind.2021.108304

Zheng, Y., Dong, L., Xia, Q., Liang, C., Wang, L., & Shao, Y. (2020). Effects of revegetation on climate in the Mu Us Sandy Land of China. *SCIENCE OF THE TOTAL ENVIRONMENT*, *739*. (WOS:000561796300007). https://doi.org/10.1016/j.scitotenv.2020.139958

Zhou, Q., Zhu, A., Yan, W., & Sun, Z. (2022). Impacts of forestland vegetation restoration on soil moisture content in humid karst region: A case study on a limestone slope. *ECOLOGICAL ENGINEERING*, *180*. (WOS:000794977500005). https://doi.org/10.1016/j.ecoleng.2022.106648

Zhou, Y., Liu, H., Zhou, J., & Xia, M. (2019). GIS-Based Urban Afforestation Spatial Patterns and a Strategy for PM2.5 Removal. *FORESTS*, *10*(10). (WOS:000498395600052). https://doi.org/10.3390/f10100875

Zhu, Y., Wang, Y., Chen, L., & Li, Z. (2021). Does non-native black locust afforestation affect soil biodiversity at the regional scale? Case study of soil macroinvertebrates across the Chinese Loess Plateau. *CATENA*, *200*. (WOS:000620777400033). https://doi.org/10.1016/j.catena.2021.105171

Zhuang, J., Zhang, J., Yang, Y., Zhang, B., & Li, J. (2017). Effect of forest shelter-belt as a regional climate improver along the old course of the Yellow River, China. *AGROFORESTRY SYSTEMS*, *91*(3), 393–401. (WOS:000403472600001). https://doi.org/10.1007/s10457-016-9928-9

**Annex 2**

**Methodology**

The 80 studies which were selected for this exercise used either empirical research, modelling analyses or literature reviews as a way to understand the impacts of A/R. 51% (N=40) of studies used empirical analyses to study A/R impacts. These included direct sampling, observations and surveys, and interviews. 45% (N=37) of research studies used modelled assessments. Modelling analyses were carried out for studies focused on scenario building by using the specifications of the regions chosen for the case studies. These cases focused on potential impacts of A/R given different modelled conditions within the region with the help of geographical models and temperature mapping of the region. 4% (N=3) of the cases used literature review methodologies.

A few papers consider multiple case study areas hence; they were coded as separate cases. The cases were openly coded in the first round in order to systematically break down, data into distinct themes which were mutually exclusive and exhaustive. The coding system in NVivo was used for this to establish different colour codes to the initial codes. The second stage of coding (axial coding) was done by grouping codes which were thematically similar to each other under broader themes. For example, *‘understanding the impact of Douglas Fir plantation on soil carbon’* was first coded as ‘impact of plantation on soil carbon’, and then as ‘impact on soil properties’ under outcome codes. The Theory of Change (ToC) framework was used as a causal-process tracing framework during the review process. Once all the cases were screened for ‘outcome’ codes, a deductive thematic process was employed based on the ToC framework to use for causal-process tracing in order to codify information under broader themes of Inputs, Outputs, Long term implications and underlying conditions in which these impacts are observed. This methodology is drawn from studies such as Chen et al., 2023; Higgins et al., 2018; Lawry et al., 2017; Macura et al., 2021; Rounsevell et al., 2020; Wunder et al., 2025 which used ToC for thematic qualitative coding. The ToC allowed us to scrutinise each case study in each study area (N=87) to produce a realistic review of the reported evidence of the steps required to produce the outcomes. This review also looks at the contextual features that affect this intervention and then leads to the desired outcomes. Using ToC, we have been able to establish a causal chain between the intermediate steps and the observed outcomes. These steps are laid down in Table 1.

Using ToC as the theoretical basis for the qualitative coding, we were able to isolate categories of ‘contextual conditions’, ‘inputs’ and ‘outcomes’ which fit into their respective causal narratives.

| *Inputs* | *Outputs* | *Outcomes* | *Long term implications* |
| --- | --- | --- | --- |
| *Modelling inputs* | ***Environmental*** |
| - Simulation of afforetsation and reforestation - Simulation of temperature and precipitation patterns - Socio-economic modelling | - Afforestation - Reforestation - Forest restoration - Reclamation | - Effect on soil properties - Effect on water cycle and quality - Effect on regional climate - GHG removal / emission reduction - Effect on biodiversity and other ecological consequences | Ensuring economic, environmental and social sustainability |
| ***Technical*** |
| - Afforestation and reofrestation initiatives, and protected area expansion - Carbon trading and plantations and monocultures - Agricultural market reform and private land management | - Technical effectiveness of of afforestation and reforestation - Effect on growth and longevity of tree species | Building momentum for future policy and planning |
| ***Socio-economic & institutional*** |
| - Cost-effectiveness and optimisation - Effect on socio-economic conditions - Effectiveness of institutional mechanisms |
| *Contextual conditions* | | | |
| *Environmental conditions* | *Technical conditions* | *Economic  conditions* | *Socio-instituional conditions* |
| - Tropical, arid, or semi arid regions - History of extreme events, land and water degradation | - Usage of specific tree species - Comparision with other A/R techniques | - Past intensive and extensive agricultural lands - Pre-existence of forest-based and non-forest based industries | Simulteneous decorbonisation efforts Established land ownership and management |

Table 1 Theory of Change of case studies of A/R impacts

**Assessment of implications of A/R outcomes on justice**

An abductive thematic analysis was utilised in order to break down the implications of A/R on justice related concerns. In order to do that, causally linked codes for 49 empirical and literature review case studies (out of the total 87) were rescrutinised through the framework of empirical justice assessment developed by Sikor et al. (2014). This framework has been used to elaborate on the subjective nature of social and environmental justice within the context in which it is observed (Brown et al., 2025; Fisher et al., 2018; Martin et al., 2016). Justice here is evaluated and categorised post-hoc to subjectively encompass different subjects, approaches (or criteria) and dimensions according to the framework. The dimensions of justice are recognitional (relating to individual and collective identities), procedural (relating to inclusive decision-making), and distributional (relating to the distribution of burdens and benefits). Justice, categorised under these dimensions, is defined according to how it affects the subjects of justice, which are individuals (individual humans), communities (of humans), generations (in the future), social systems (such as economy, regulatory institutions), non-human individuals and communities of animals, and nature as an entity in itself. Approaches of justice are defined according to the relationship exhibited by the subjects of justice or injustice.

The causal links between the outcomes and the contextual conditions were re-examined through the lens of this framework. Potential justice implications were noted for each category of outcomes, according to the causal links these outcomes had. The assessment and the explanations for these have been shown in the Supplementary Material 2.

For better understanding of the results of the assessment, the qualitative information was given a score from the scale of 1 to -1 where 1 was a just outcome and -1 was an unjust outcome. Since the assessment was carried out over 3 dimensions of justice, the final score for each stakeholder could range from 3 to -3. This process was repeated for all outcomes and then represented visually in the form of radar charts. The limitation of this method was that an N/A score was considered the same as the score for a just + unjust outcome, which was 0. However, this was justified through the explanations provided in the text.

Methodology Reference List

Brown, D., Martin, A., Fisher, J. A., & Gingembre, M. (2025). Towards a transformative approach to just rural transitions: Landscape restoration in the Scottish highlands. *Environment and Planning E: Nature and Space*, *8*(6), 1839–1865. https://doi.org/10.1177/25148486251367163

Chen, H., Zhang, T., Costanza, R., & Kubiszewski, I. (2023). Review of the approaches for assessing protected areas’ effectiveness. *Environmental Impact Assessment Review*, *98*, 106929. https://doi.org/10.1016/j.eiar.2022.106929

Fisher, J. A., Cavanagh, C. J., Sikor, T., & Mwayafu, D. M. (2018). Linking notions of justice and project outcomes in carbon offset forestry projects: Insights from a comparative study in Uganda. *Land Use Policy*, *73*, 259–268. https://doi.org/10.1016/j.landusepol.2017.12.055

Higgins, D., Balint, T., Liversage, H., & Winters, P. (2018). Investigating the impacts of increased rural land tenure security: A systematic review of the evidence. *Journal of Rural Studies*, *61*, 34–62. https://doi.org/10.1016/j.jrurstud.2018.05.001

Lawry, S., Samii, C., Hall, R., Leopold, A., Hornby, D., & Mtero, F. (2017). The impact of land property rights interventions on investment and agricultural productivity in developing countries: A systematic review. *Journal of Development Effectiveness*, *9*(1), 61–81. https://doi.org/10.1080/19439342.2016.1160947

Macura, B., Canales, N., Bakhtaoui, I., Taylor, R., Kwamboka, E., Diaz-Chavez, R., Vanhuyse, F., Garside, R., Ndiaye, D. B. O., Sang, J., Schaar, J., Vaughan, K., & Klein, R. J. T. (2021). *Effectiveness of climate change adaptation interventions in sub-Saharan Africa and the impact of funding modalities: A mixed methods systematic review protocol*. Stockholm Environment Institute. https://doi.org/10.51414/sei2021.021

Martin, A., Coolsaet, B., Corbera, E., Dawson, N. M., Fraser, J. A., Lehmann, I., & Rodriguez, I. (2016). Justice and conservation: The need to incorporate recognition. *Biological Conservation*, *197*, 254–261. https://doi.org/10.1016/j.biocon.2016.03.021

Rounsevell, M. D. A., Harfoot, M., Harrison, P. A., Newbold, T., Gregory, R. D., & Mace, G. M. (2020). A biodiversity target based on species extinctions. *Science*, *368*(6496), 1193–1195. https://doi.org/10.1126/science.aba6592

Sikor, T., Martin, A., Fisher, J., & He, J. (2014). Toward an Empirical Analysis of Justice in Ecosystem Governance. *Conservation Letters*, *7*(6), 524–532. https://doi.org/10.1111/conl.12142

Wunder, S., Fraccaroli, C., Varela, E., Bruzzese, S., & Termansen, M. (2025). Examining innovative designs of agri-environmental schemes in Europe: A case comparison of impact pathways. *Ecosystem Services*, *73*, 101728. https://doi.org/10.1016/j.ecoser.2025.101728
